# Supplementary material for: Biodegradable Protein-Stabilized Inorganic Nanoassemblies for Photothermal Radiotherapy of Hepatoma Cells
Source: PubMed Central journal article supplement — ACS Omega. 2022 Mar 4;7(10):8928–37. doi: 10.1021/acsomega.1c07324 (PMC8928496; doi:10.1021/acsomega.1c07324), 2022-03-04
Supplement: ao1c07324_si_001.pdf [file ao1c07324_si_001.pdf]

## **Supplementary Information**

### **Biodegradable protein stabilized inorganic nanoassemblies for photothermal radiotherapy of hepatoma cells**

Pranjali Yadav<sup>1</sup>, Shubhra Chaturvedi<sup>2</sup>, Samir Kumar Biswas<sup>3</sup>, Rohit Srivastava<sup>4</sup>, Kamalakannan Kailasam<sup>1\*</sup>, Anil Kumar Mishra<sup>2\*</sup>, Asifkhan Shanavas<sup>1\*</sup>

<sup>1</sup>Institute of Nano Science and Technology (INST), Phase 10, SAS Nagar, Mohali -160062, India

<sup>2</sup>Division of Cyclotron and Radiopharmaceutical Sciences, Institute of Nuclear Medicine and Allied Sciences, DRDO, Delhi, India

<sup>3</sup>Department of Physical Sciences, Indian Institute of Science Education & Research Mohali, Knowledge city, Sector 81, SAS Nagar, Manauli-140306, India.

<sup>4</sup>Department of Biosciences & Bioengineering, Indian Institute of Technology Bombay, Powai, Mumbai, Maharashtra 400076

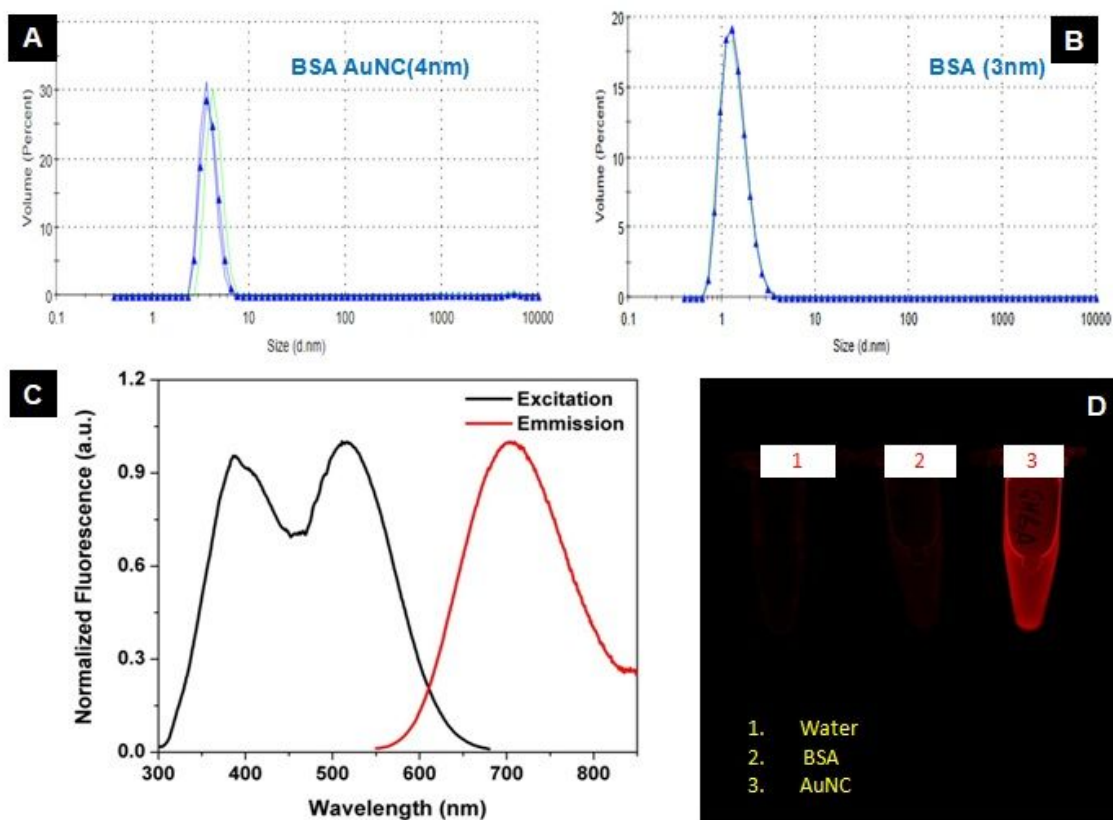

Figure S1: Dynamic Light Scattering (DLS) showing size distribution of (A) AuNC and (B) BSA; (C) Excitation and emission spectra of AuNC (D) Fluorescent images of water, BSA and AuNC

**Table 1: Optimization of different concentration of AuNC incubated with Prot-ION**

| S. No. | IOC<br>(Vol. in mL) | AuNC<br>(Vol. in mL) | Double distilled<br>water<br>(Vol. in mL) |
|--------|---------------------|----------------------|-------------------------------------------|
| 1      | 1                   | 0.5                  | 3.5                                       |
| 2      | 1                   | 1                    | 3                                         |
| 3      | 1                   | 2                    | 2                                         |
| 4      | 1                   | 3                    | 1                                         |

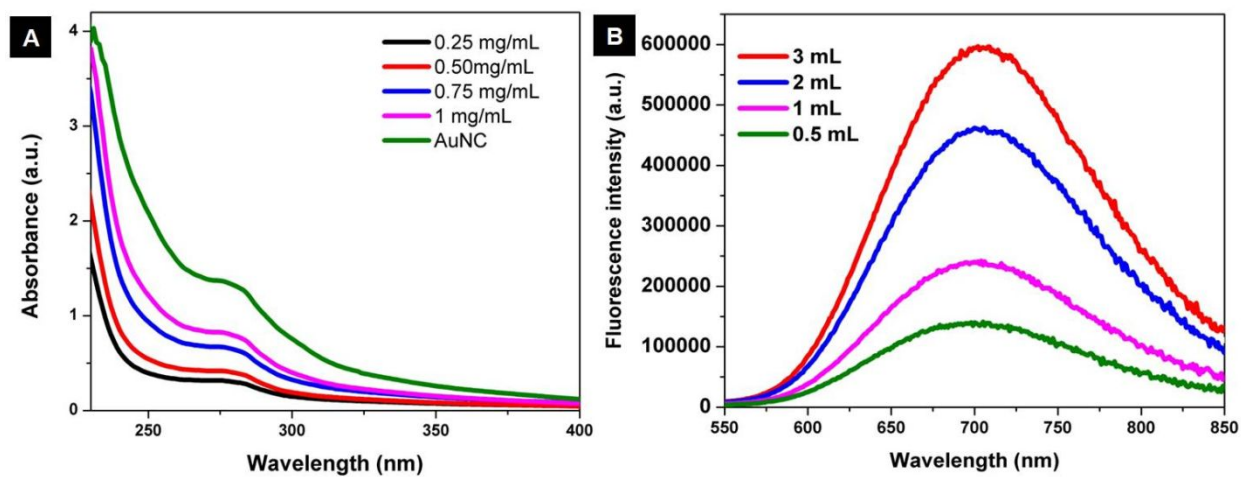

**Figure S2: (A) UV-Visible spectra and (B) Fluorescent emission spectra of pellets of different concentration of AuNC incubated with IOC redispersed in water.**

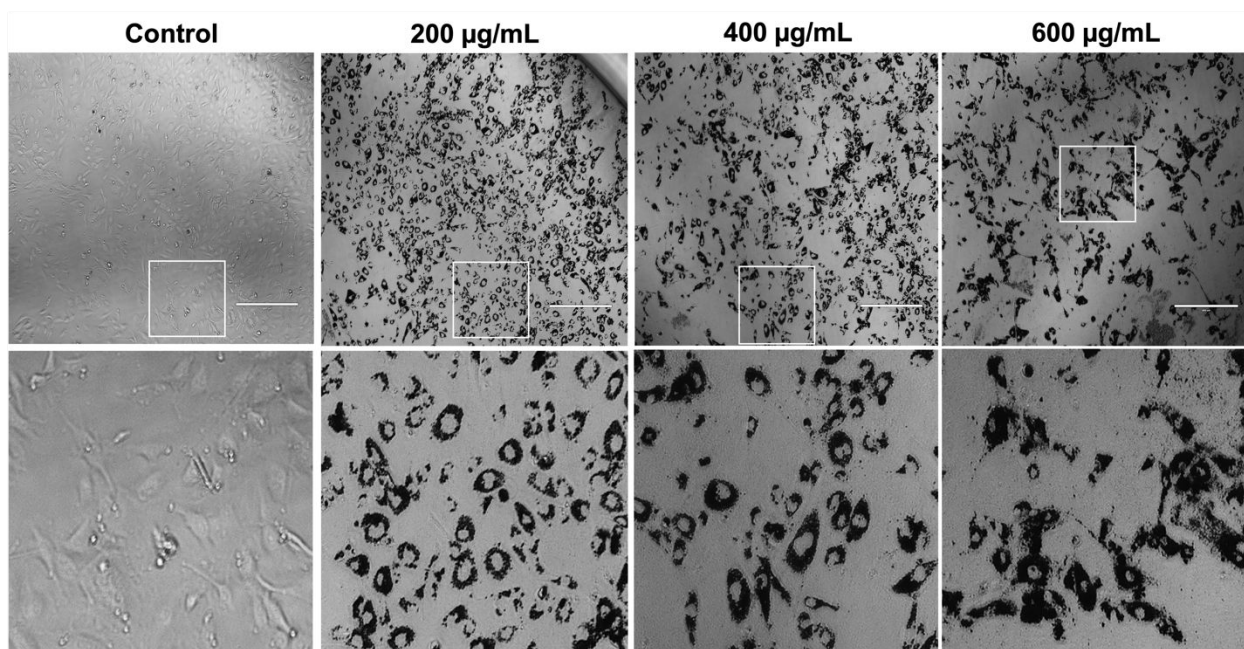

**Figure S3: Bright field images of HuVEC cells incubated with different concentrations of Prot-ION. Bottom panel images are enlarged from areas indicated as white squares in top panel.**

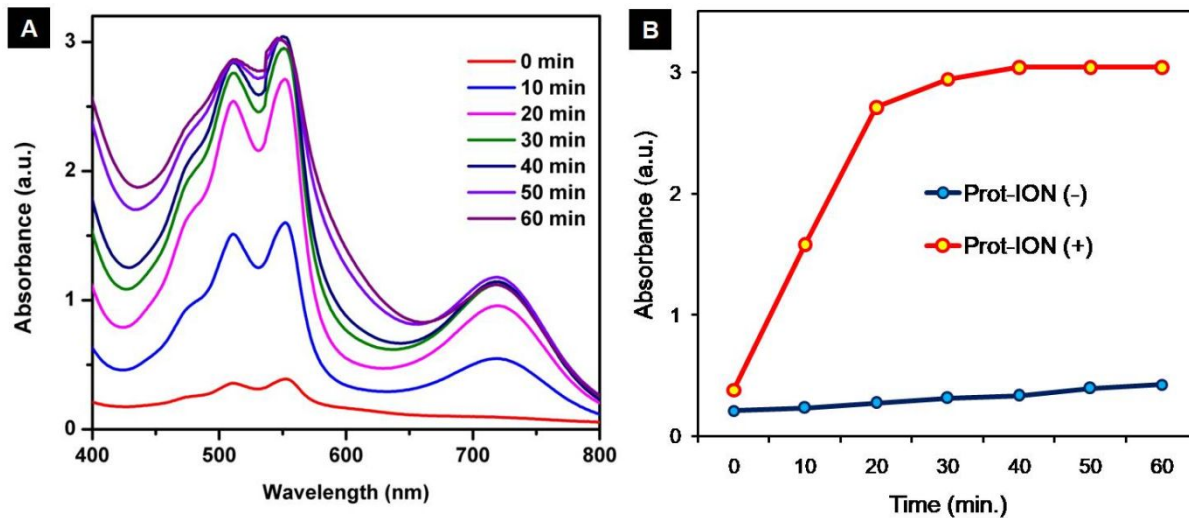

Figure S4: (A) UV-visible spectra of DPD solution as a function of reaction time of 60 min in presence of Prot-ION (B) Time dependent increase in ROS in acidic conditions in presence of  $H_2O_2$  and Prot-ION
